# Supplementary material
Source: publisher site journal article supplement (https://www.dovepress.com/article/339863)
Supplement: Supplementary file 1 [file get_supplementary_file.php]

**Table** **S1.** Baseline characteristics of 2506 participants according to periodontal status after PSM.

| **Characteristic** | **Total** | **No Periodontitis** | **Periodontitis** | **P**  **value** |
| --- | --- | --- | --- | --- |
| **No. (%)** | **No. (%)** | **No. (%)** |
| Total | 2506 | 1253 (50.0) | 1253 (50.0) |  |
| Sex |  |  |  | 0.490 |
| Male | 1479 (59.0) | 731 (58.3) | 748 (59.7) |  |
| Female | 1027 (41.0) | 522 (41.7) | 505 (40.3) |  |
| Age, years |  |  |  | 0.541 |
| Mean, SD | 53.27, 13.64 | 53.64, 13.81 | 52.91, 13.46 | 0.182 |
| 30-39 | 462 (18.4) | 219 (17.5) | 243 (19.40 |  |
| 40-49 | 576 (23.0) | 283 (22.6) | 293 (23.4) |  |
| 50-59 | 597 (23.8) | 298 (23.8) | 299 (23.9) |  |
| 60-69 | 536 (21.4) | 275 (21.9) | 261 (20.8) |  |
| ≥70 | 335 (13.4) | 178 (14.2) | 157 (12.5) |  |
| Race |  |  |  | 0.991 |
| Non-Hispanic white | 830 (33.1) | 418 (33.4) | 412 (32.9) |  |
| Non-Hispanic black | 638 (25.5) | 322 (25.7) | 316 (25.2) |  |
| Mexican American | 513 (20.5) | 255 (20.4) | 258 (20.6) |  |
| Other Hispanic | 253 (10.1) | 124 (9.9) | 129 (10.3) |  |
| Other | 272 (10.9) | 134 (10.7) | 138 (11.0) |  |
| Education |  |  |  | 0.754 |
| Less than high school | 789 (31.5) | 390 (31.1) | 399 (31.8) |  |
| High school or equivalent | 610 (24.3) | 300 (23.9) | 310 (24.7) |  |
| College or above | 1101 (43.9) | 559 (44.6) | 542 (43.3) |  |
| Other | 6 (0.2) | 4 (0.3) | 2 (0.2) |  |
| Marital status |  |  |  | 0.968 |
| Married | 1329 (53.0) | 665 (53.1) | 664 (53.0) |  |
| Unmarried/Other | 1177 (47.0) | 588 (46.9) | 589 (47.0) |  |
| BMI |  |  |  | 0.817 |
| Mean, SD | 29.70, 6.76 | 29.70, 6.78 | 29.70, 6.74 | 0.974 |
| <25 kg/m2 | 623 (24.9) | 314 (25.1) | 309 (24.7) |  |
| ≥25 kg/m2 | 1883 (75.1) | 939 (74.9) | 944 (75.3) |  |
| Hypertension |  |  |  | 0.627 |
| Yes | 1048 (41.8) | 530 (42.3) | 518 (41.3) |  |
| No/Unknown | 1458 (58.2) | 723 (57.7) | 735 (58.7) |  |
| Diabetes mellitus |  |  |  | 0.891 |
| Yes | 361 (14.4) | 178 (14.2) | 183 (14.6) |  |
| Prediabetes | 69 (2.8) | 33 (2.6) | 36 (2.9) |  |
| No/Unknown | 2076 (82.8) | 1042 (83.2) | 1034 (82.5) |  |
| Smoking |  |  |  | 0.980 |
| Never | 1231 (49.1) | 613 (48.9) | 618 (49.3) |  |
| Former | 670 (26.7) | 336 (26.8) | 334 (26.7) |  |
| Current | 605 (24.1) | 304 (24.3) | 301 (24.0) |  |
| Physical activity status |  |  |  |  |
| Vigorous |  |  |  | 0.482 |
| Yes | 336 (13.4) | 162 (12.9) | 174 (13.9) |  |
| No | 2170 (86.6) | 1091 (87.1) | 1079 (86.1) |  |
| Moderate |  |  |  | 0.119 |
| Yes | 859 (34.3) | 411 (32.8) | 448 (35.8) |  |
| No | 1647 (65.7) | 842 (67.2) | 805 (64.2) |  |
| Missing teeth | 5.88, 6.44 | 6.04, 6.96 | 5.73, 5.87 | 0.237 |
| Teeth | 24.12, 6.44 | 23.96, 6.96 | 24.27, 5.87 | 0.237 |
| PD≥4mm teeth | 2.09, 4.01 | 0.01, 0.10 | 4.17, 4.85 | <0.001 |
| PD≥5mm teeth | 1.52, 3.27 | 0.00, 0.00 | 3.03, 4.09 | <0.001 |
| AL≥3mm teeth | 7.89, 6.92 | 4.14, 4.73 | 11.63, 6.74 | <0.001 |
| AL≥4mm teeth | 3.95, 5.22 | 1.63, 2.97 | 6.28, 5.91 | <0.001 |
| Fasting glucose | 105.39, 32.95 | 104.04, 29.40 | 106.74, 36.11 | 0.040 |
| Total cholesterol | 195.36, 39.41 | 193.83, 38.61 | 196.89, 40.15 | 0.344 |
| Triglycerides | 124.74, 68.07 | 123.45, 66.51 | 126.02, 69.59 | 0.536 |
| HDL-C | 52.64, 15.49 | 52.83, 14.96 | 52.45, 16.01 | 0.034 |
| LDL-C | 117.77, 34.71 | 116.30, 34.11 | 119.24, 35.25 | 0.052 |
| TyG | 8.62, 0.61 | 8.61, 0.59 | 8.64, 0.62 | 0.227 |

**Abbreviations:**

BMI, Body mass index; TyG, triglyceride-glucose; PSM, propensity score matching; HDL-C, high-density lipoprotein cholesterol; LDL-C, low-density lipoprotein cholesterol.

Continuous variables were presented as mean and standard deviation and categorical variables were expressed as n (%). For categorical variables, P values were analyzed by chi-square tests. For continuous variables, the t-test was used in generalized linear models.

Prevalence was reported using the CDC/AAP recommended case definition for periodontitis surveillance.


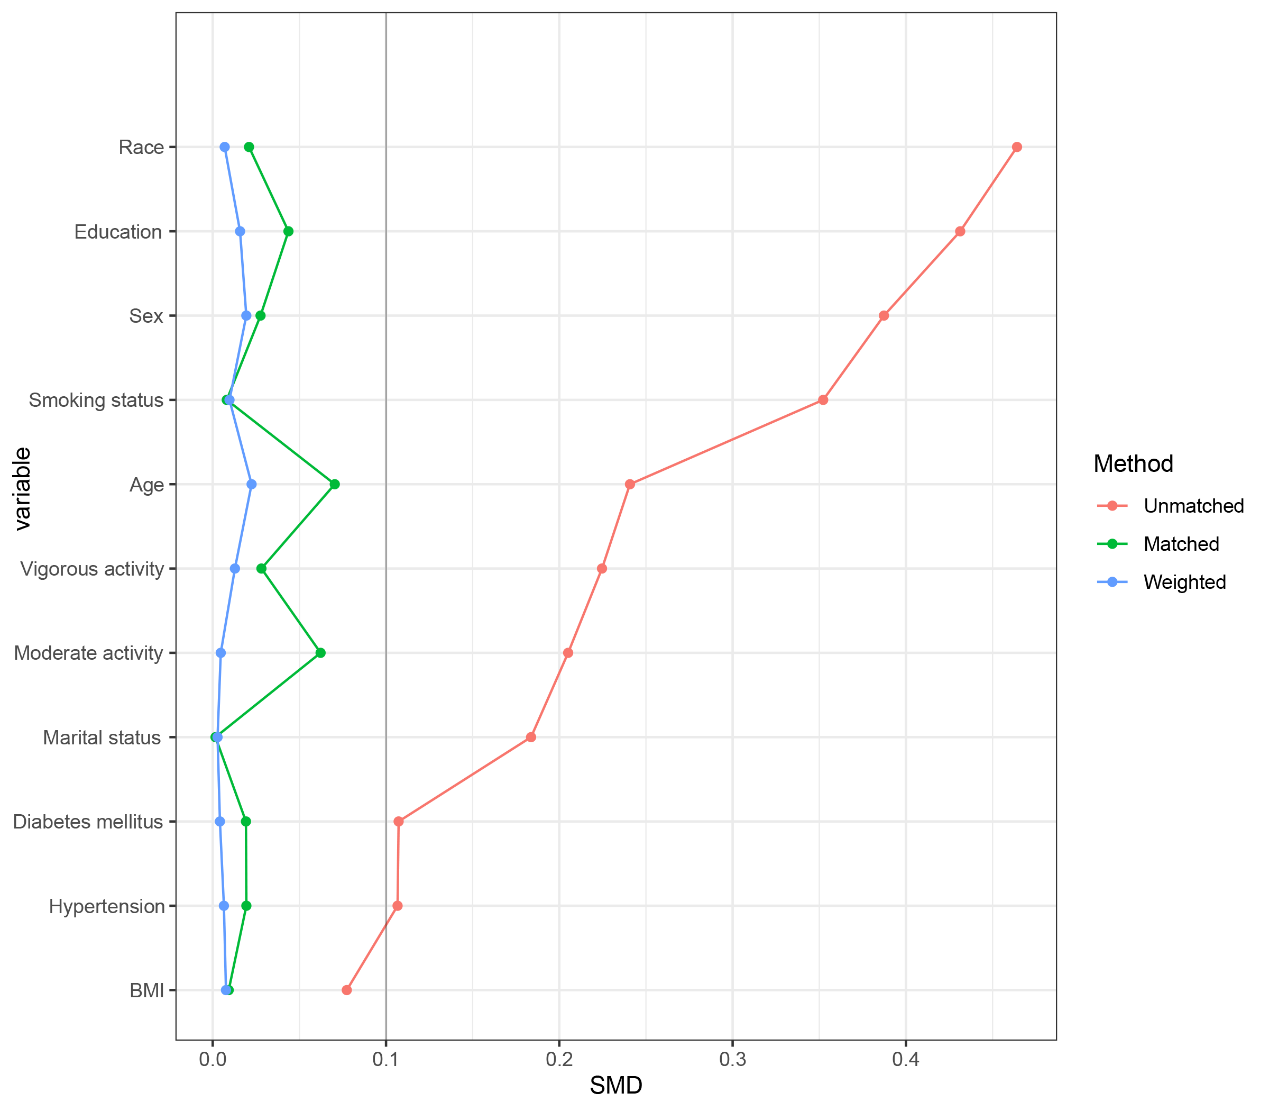


**Figure S1.** The standardized mean difference (SMD) results of different variables after PSM.
